# Supplementary material for: Proton leap: shuttling of protons onto benzonitrile
Source: Royal Society of Chemistry journal article supplement (doi:10.1039/d1cp04338b), 2022-01-01
Supplement: d1cp04338b1.pdf [file d1cp04338b1.pdf]

## Proton leap: Shuttling of protons onto benzonitrile

Nemanja Pavković, Branislav Milovanović, Ana Stanojević, Mihajlo Etinski, and Milena Petković\*  
University of Belgrade – Faculty of Physical Chemistry, Studentski trg 12-16, 11 158 Belgrade, Serbia

\* E-mail: milena@ffh.bg.ac.rs

### Supplementary Information

Figure S1: Energy change along the reaction coordinate defined as: A) N–H distance,  $r_{\text{NH}}$ ; B) distance between reactants' centres of masses,  $r_{\text{COM}}$ ; C) distance between  $r_{\text{COM}}$  defined as being negative/positive before/beyond the turning point (turning point TP corresponds to the shortest  $r_{\text{COM}}$  value). The arrows indicate the direction of the reaction.

Figure S2: A) Deformation energies and B) propagation energies for BN (red), H<sub>2</sub> (green), H<sup>+</sup> (blue) and the whole system (black).

Figure S3: A) Classical; B) non-classical; and C) total interaction energies for BN–H<sup>+</sup> (blue), H<sub>2</sub>–H<sup>+</sup> (turquoise), BN–H<sub>2</sub> (orange) and the whole system (black).

Figure S4: Difference between corresponding energy terms with and without the carrier H<sub>2</sub>: classical (black, dashed), nonclassical (black, dotted), total interaction (black, solid) energy, as well as promotion energy for BN (red) and H<sup>+</sup> (blue).

Figure S5: Optimized structure of the adduct N-ethyl benzonitrilium cation.

Table S1: Reaction rate constants obtained from the classical Langevin capture model using *ab initio* molecular dynamics calculations at 10 K and 100 K.

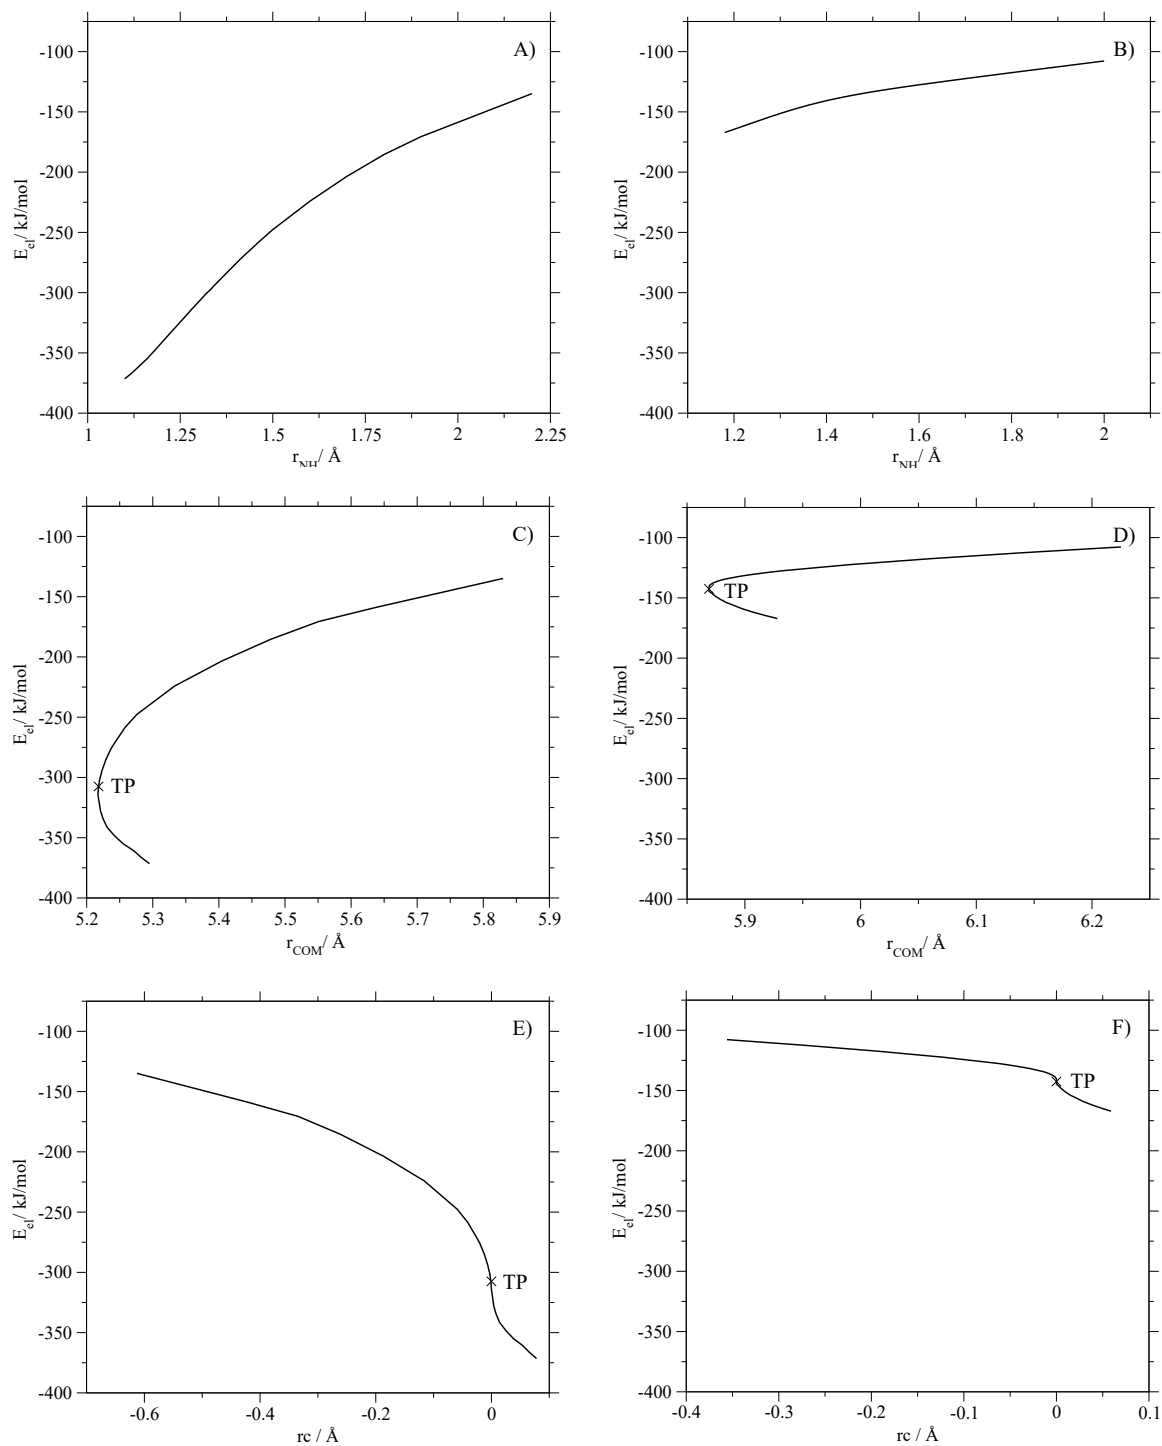

**Fig. S1** Energy change along the reaction coordinate defined as: A) N–H distance,  $r_{NH}$ ; B) distance between reactants' centres of masses,  $r_{COM}$ ; C) distance between  $r_{COM}$  defined as being negative/positive before/beyond the turning point (turning point TP corresponds to the shortest  $r_{COM}$  value). The arrows indicate the direction of the reaction.

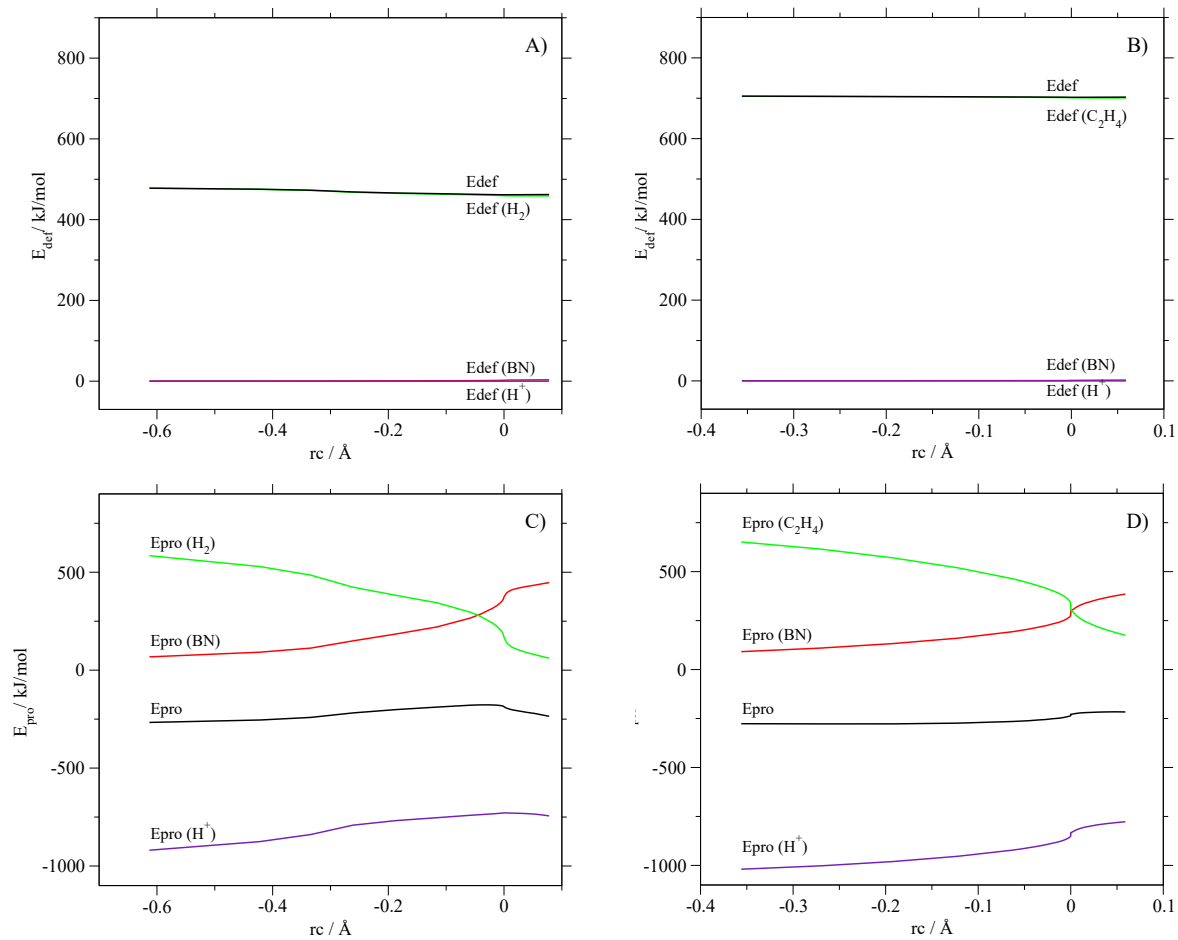

**Fig. S2** A) Deformation energies and B) propagation energies for BN (red),  $\text{H}_2$  (green),  $\text{H}^+$  (blue) and the whole system (black).

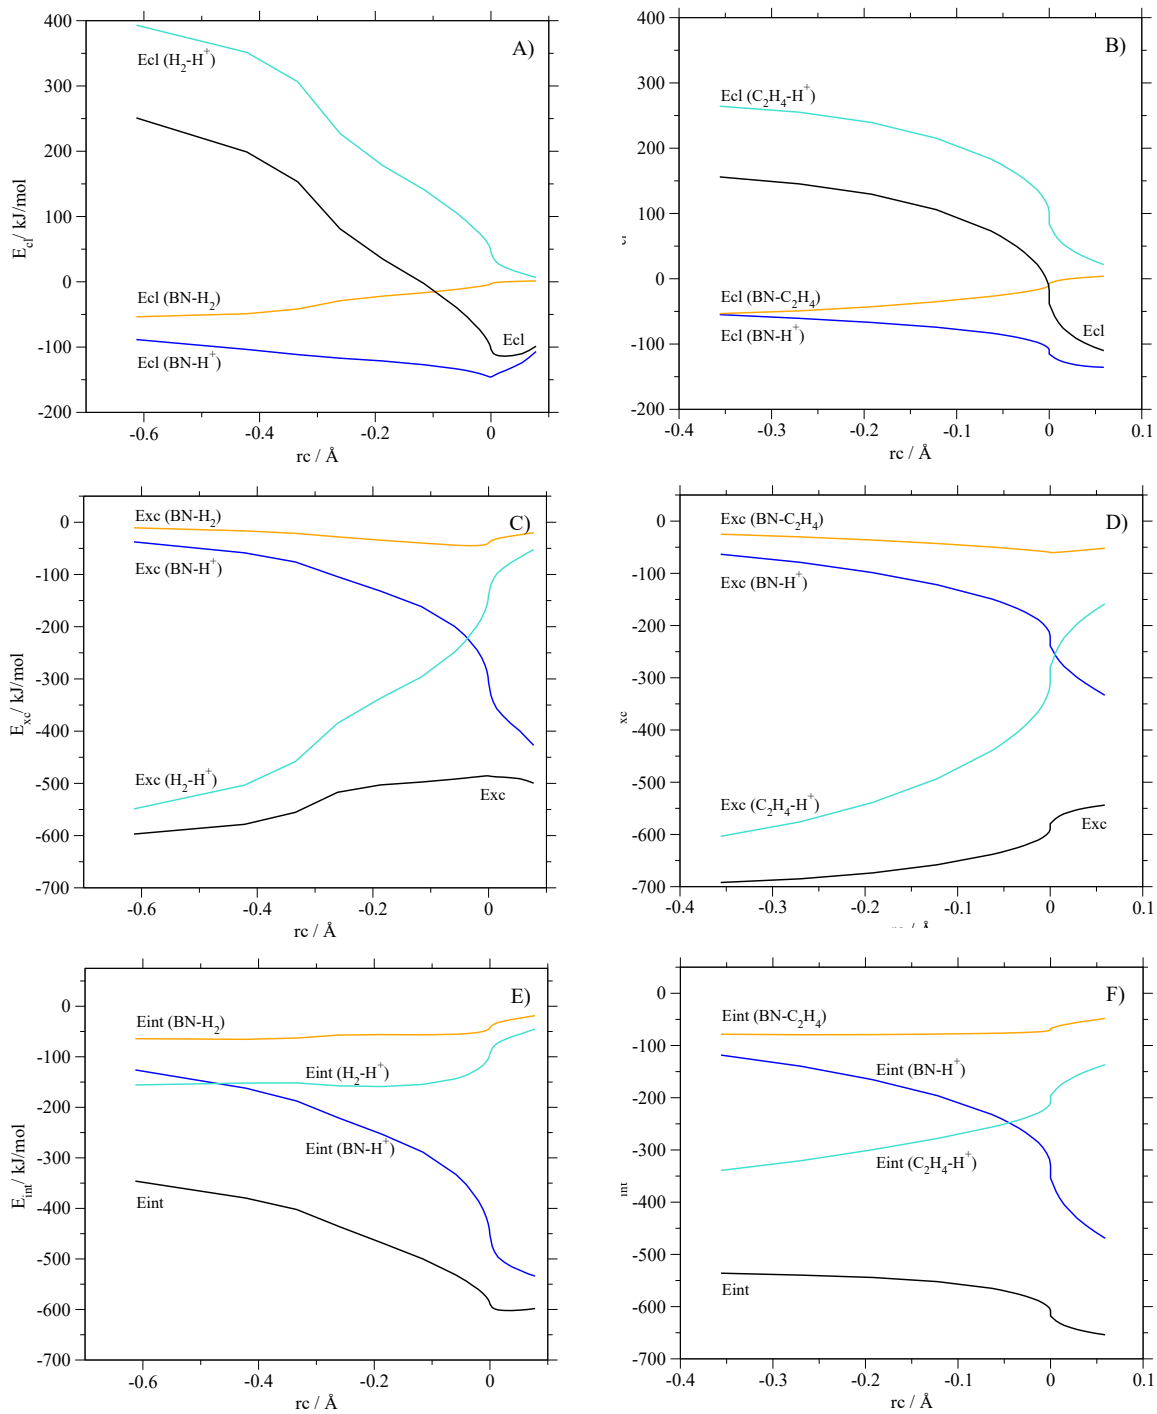

**Fig. S3** A) Classical; B) non-classical; and C) total interaction energies for BN-H<sup>+</sup> (blue), H<sub>2</sub>-H<sup>+</sup> (turquoise), BN-H<sub>2</sub> (orange) and the whole system (black).

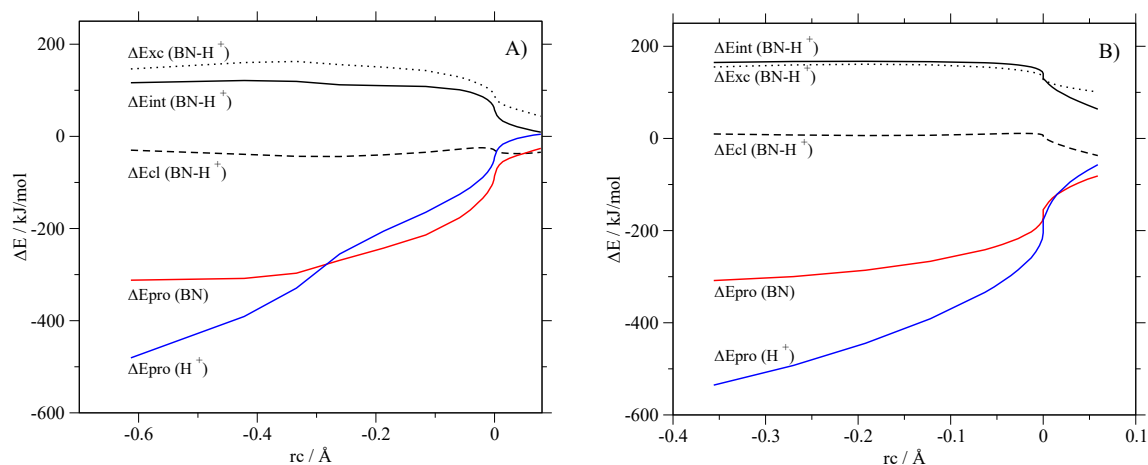

**Fig. S4** Difference between corresponding energy terms with and without the carrier  $H_2$ : classical (black, dashed), nonclassical (black, dotted), total interaction (black, solid) energy, as well as promotion energy for BN (red) and  $H^+$  (blue).

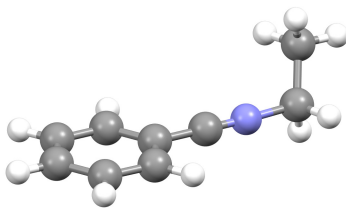

**Fig. S5** Optimized structure of the adduct N-ethyl benzonitrilium cation.

**Table S1** Reaction rate constants obtained from the classical Langevin capture model using *ab initio* molecular dynamics calculations at 10 K and 100 K.

| System                               | $T / K$ | $C / \text{kJ mol}^{-1} \text{Å}^n$ | $n$   | $R^2$  | $k / \text{cm}^3 \text{s}^{-1}$ | $\bar{k} / \text{cm}^3 \text{s}^{-1}$ |
|--------------------------------------|---------|-------------------------------------|-------|--------|---------------------------------|---------------------------------------|
| $\text{BN} - \text{H}_3^+$           | 10      | $2.358 \cdot 10^5$                  | 4.171 | 0.9769 | $2.5191 \cdot 10^{-8}$          | $2.5253 \cdot 10^{-8}$                |
|                                      |         | $2.395 \cdot 10^5$                  | 4.187 | 0.9755 | $2.5393 \cdot 10^{-8}$          |                                       |
|                                      |         | $2.355 \cdot 10^5$                  | 4.170 | 0.9811 | $2.5175 \cdot 10^{-8}$          |                                       |
|                                      | 100     | $1.809 \cdot 10^5$                  | 4.155 | 0.9891 | $2.2064 \cdot 10^{-8}$          | $2.8327 \cdot 10^{-8}$                |
|                                      |         | $4.350 \cdot 10^5$                  | 4.557 | 0.9895 | $3.4215 \cdot 10^{-8}$          |                                       |
|                                      |         | $3.061 \cdot 10^5$                  | 4.406 | 0.9891 | $2.8701 \cdot 10^{-8}$          |                                       |
| $\text{BN} - \text{C}_2\text{H}_5^+$ | 10      | $6.974 \cdot 10^4$                  | 3.533 | 0.9951 | $4.9288 \cdot 10^{-9}$          | $4.6989 \cdot 10^{-9}$                |
|                                      |         | $6.941 \cdot 10^4$                  | 3.532 | 0.9949 | $4.9171 \cdot 10^{-9}$          |                                       |
|                                      |         | $5.187 \cdot 10^4$                  | 3.398 | 0.9969 | $4.4251 \cdot 10^{-9}$          |                                       |
|                                      | 100     | $9.888 \cdot 10^4$                  | 3.772 | 0.9956 | $5.8689 \cdot 10^{-9}$          | $6.6449 \cdot 10^{-9}$                |
|                                      |         | $1.138 \cdot 10^5$                  | 3.874 | 0.9914 | $6.2961 \cdot 10^{-9}$          |                                       |
|                                      |         | $1.733 \cdot 10^5$                  | 4.083 | 0.9898 | $7.7696 \cdot 10^{-9}$          |                                       |
